# Supplementary material for: Confined bicontinuous microemulsions: nanoscale dynamics of the surfactant film
Source: Royal Society of Chemistry journal article supplement (doi:10.1039/d4sm00925h), 2024-01-01
Supplement: d4sm00925h1.pdf [file d4sm00925h1.pdf]

## Supporting Information

### Confined Bicontinuous Microemulsions: Nanoscale Dynamics of the Surfactant Film

Margarethe Dahl,<sup>a</sup> Olaf Holderer,<sup>b</sup> René Haverkamp,<sup>c</sup> Ingo Hoffmann,<sup>d</sup> Kathleen Wood,<sup>e</sup> Jessica Hübner,<sup>a</sup> Thomas Hellweg,<sup>c</sup> and Stefan Wellert<sup>a</sup>

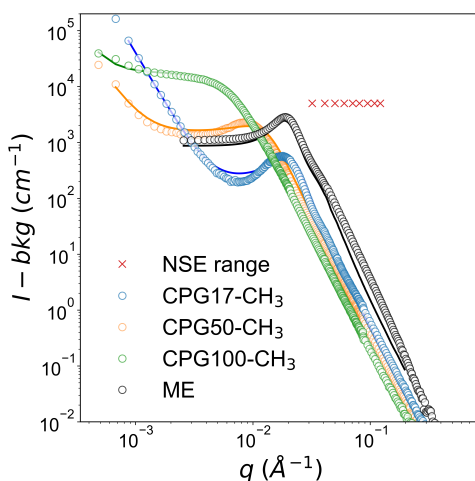

Fig. S 1 SANS signal of the air-filled hydrophobic CPG and the bicontinuous microemulsion in bulk (ME). The red crosses represent the investigated  $q$ -range by NSE.

Table S 1 Fit Parameters of the intermediate scattering function of the microemulsion in bulk

| $q$ (1/Å) | $\Gamma_c$ ( $\times 10^3$ /ns) | $\Gamma_z$ (1/ns) | $A$             |
|-----------|---------------------------------|-------------------|-----------------|
| 0.032     | $1.38 \pm 0.07$                 | $0.04 \pm 0.01$   | $0.17 \pm 0.02$ |
| 0.041     | $1.78 \pm 0.07$                 | $0.04 \pm 0.01$   | $0.21 \pm 0.02$ |
| 0.050     | $2.29 \pm 0.12$                 | $0.04 \pm 0.01$   | $0.29 \pm 0.02$ |
| 0.060     | $4.62 \pm 0.20$                 | $0.08 \pm 0.01$   | $0.26 \pm 0.02$ |
| 0.071     | $5.84 \pm 0.31$                 | $0.09 \pm 0.01$   | $0.36 \pm 0.03$ |
| 0.081     | $8.38 \pm 0.47$                 | $0.12 \pm 0.01$   | $0.39 \pm 0.03$ |
| 0.095     | $15.57 \pm 0.54$                | $0.17 \pm 0.01$   | $0.47 \pm 0.02$ |
| 0.109     | $20.63 \pm 1.18$                | $0.21 \pm 0.01$   | $0.54 \pm 0.03$ |
| 0.122     | $32.38 \pm 3.85$                | $0.27 \pm 0.05$   | $0.50 \pm 0.07$ |

<sup>a</sup> Department of Chemistry, Technische Universität Berlin, Straße des 17. Juni 124, 10623 Berlin, Germany. E-mail: a.dahl@tu-berlin.de

<sup>b</sup> Jülich Centre for Neutron Science (JCNS) at Heinz Maier-Leibnitz Zentrum (MLZ), Garching, Germany.

<sup>c</sup> Department of Chemistry, Physical and Biophysical Chemistry Group, University of Bielefeld, Universitätsstraße 25, 33615 Bielefeld, Germany.

<sup>d</sup> Institut Laue-Langevin, 71 avenue des Martyrs, F-38042 Grenoble, France.

<sup>e</sup> Australian Nuclear and Technology Organisation, New Illawarra Rd, Lucas Heights, NSW 2234, Australia

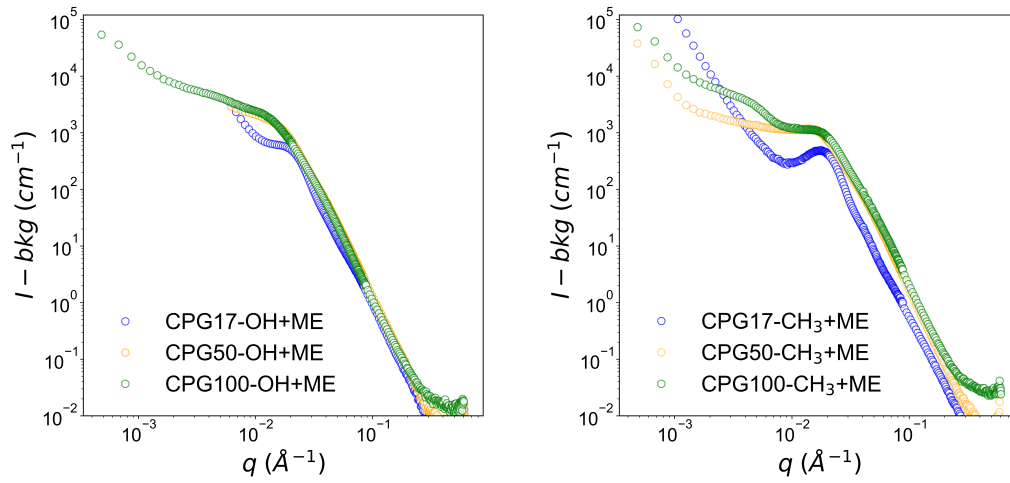

Fig. S 2 SANS signal of the CPG imbibed with the microemulsion, left hydrophilic CPG and right hydrophobic CPG.

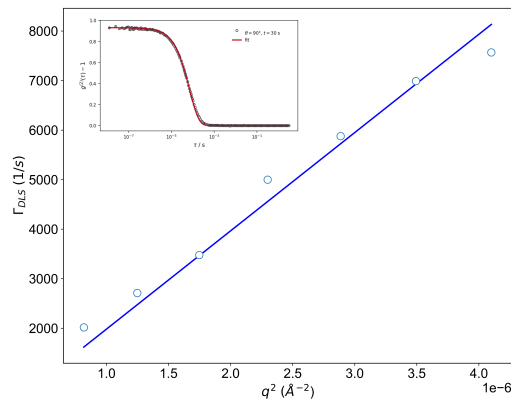

Fig. S 3 Decay rate  $\Gamma_{DLS}$  in dependence of  $q^2$ , the slope (solid line) determines the diffusion coefficient. Inset: The intensity-autocorrelation function at a scattering angle of  $90^\circ$ . Uncertainties are within the symbols.

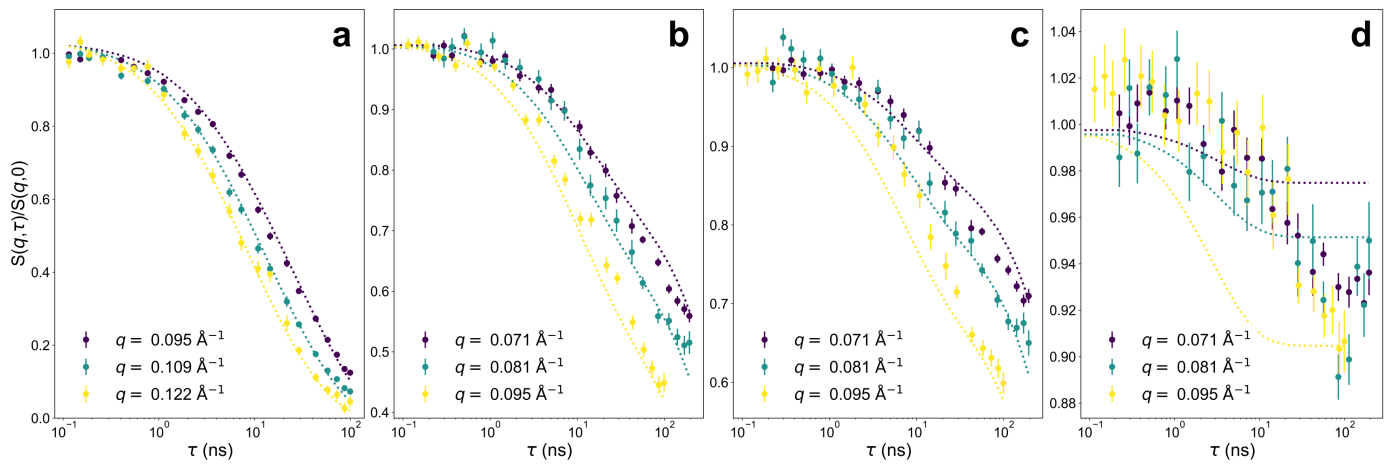

Fig. S 4 Normalized intermediate scattering functions of the confined microemulsion in the hydrophilic CPG100-OH (a), CPG-50-OH (b) and CPG17-OH (c) for several  $q$  values and the fit to the Eq. 9.

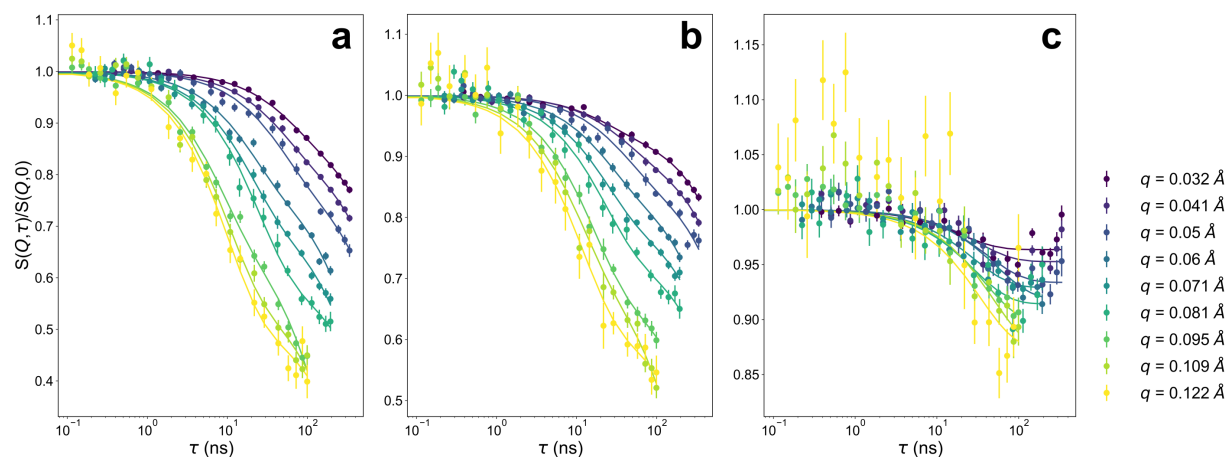

Fig. S 5 Normalized intermediate scattering function of the confined microemulsion in the hydrophilic CPG100-OH (a), CPG50-OH (b) and CPG17-OH.

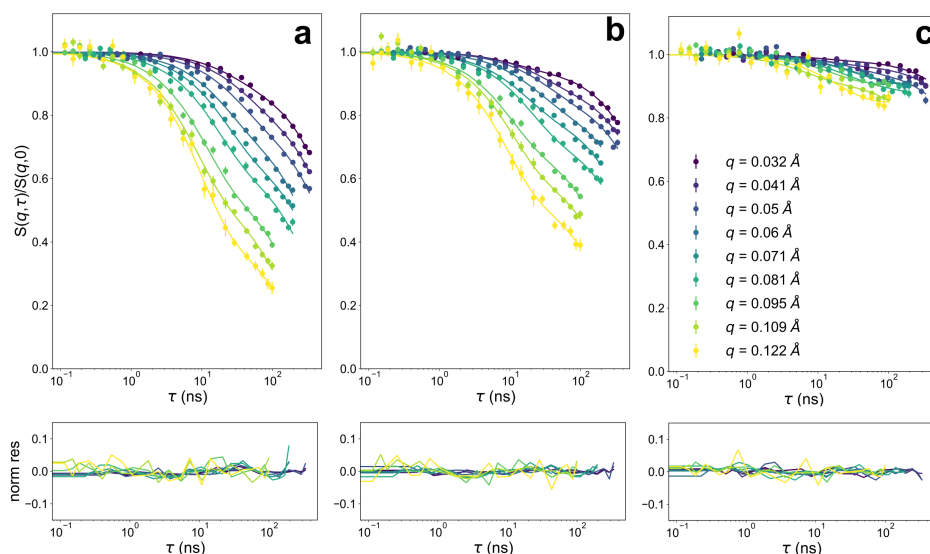

Fig. S 6 Normalized intermediate scattering functions of the confined microemulsion in the hydrophobic CPG100-CH<sub>3</sub> (a), CPG50-CH<sub>3</sub> (b) and CPG17-CH<sub>3</sub> (c) for several  $q$  values. Bottom: normalized residuals of the fit.

Table S 2 Fit Parameters of the intermediate scattering function of the microemulsion inside the hydrophilic CPG17-OH

| $q$ (1/Å) | $A$       | $\Gamma_c$ (1/ns) <sup>a</sup> | $\Gamma_z$ (1/ns) |
|-----------|-----------|--------------------------------|-------------------|
| 0.032     | 0.04±0.01 | 2.1e-24±0.001                  | 0.074±0.036       |
| 0.041     | 0.05±0.02 | 2.8e-60±0.001                  | 0.048±0.027       |
| 0.050     | 0.07±0.02 | 4.4e-20±0.001                  | 0.036±0.015       |
| 0.060     | 0.08±0.05 | 4.4e-22±0.001                  | 0.028±0.160       |
| 0.071     | 0.07±0.02 | 1.4e-21±0.001                  | 0.053±0.018       |
| 0.081     | 0.09±0.04 | 8.9e-24±0.001                  | 0.053±0.035       |
| 0.095     | 0.10±0.18 | 1.2e-15±0.002                  | 0.040±0.058       |
| 0.109     | 0.13±0.59 | 4.5e-18±0.004                  | 0.031±0.101       |
| 0.122     | 0.13±0.57 | 3.8e-19±0.006                  | 0.044±0.177       |

<sup>a</sup> approx. 0, the contribution of  $\Gamma_c$  to the intermediate scattering function is negligible.

Table S 3 Fit Parameters of the intermediate scattering function of the microemulsion inside the hydrophobic CPG17-CH<sub>3</sub>

| $q$ (1/Å) | $A$       | $\Gamma_c$ (1/ns) <sup>a</sup> | $\Gamma_z$ (1/ns) |
|-----------|-----------|--------------------------------|-------------------|
| 0.032     | 0.02±0.01 | 1.9e-04±0.001                  | 0.144±0.124       |
| 0.041     | 0.03±0.01 | 2.0e-04±0.001                  | 0.109±0.058       |
| 0.050     | 0.05±0.02 | 2.5e-04±0.001                  | 0.061±0.037       |
| 0.060     | 0.08±0.02 | 1.1e-04±0.001                  | 0.051±0.016       |
| 0.071     | 0.07±0.02 | 1.6e-04±0.001                  | 0.056±0.015       |
| 0.081     | 0.09±0.03 | 1.7e-04±0.001                  | 0.063±0.027       |
| 0.095     | 0.09±0.04 | 2.6e-20±0.002                  | 0.091±0.041       |
| 0.109     | 0.08±0.01 | 7.2e-04±0.004                  | 0.220±0.051       |
| 0.122     | 0.15±0.07 | 6.3e-10±0.006                  | 0.079±0.043       |

<sup>a</sup> approx. 0, the contribution of  $\Gamma_c$  o the intermediate scattering function is negligible.

Table S 4 Fit Parameters of the intermediate scattering function of the microemulsion inside the hydrophilic CPG50-OH

| $q$ (1/Å) | $A$       | $\Gamma_c$ (1/ns) | $\Gamma_z$ (1/ns) |
|-----------|-----------|-------------------|-------------------|
| 0.032     | 0.06±0.01 | 0.0003±0.0001     | 0.066±0.009       |
| 0.041     | 0.09±0.01 | 0.0004±0.0001     | 0.021±0.006       |
| 0.050     | 0.13±0.03 | 0.0004±0.0002     | 0.039±0.010       |
| 0.060     | 0.14±0.02 | 0.0007±0.0002     | 0.062±0.009       |
| 0.071     | 0.20±0.01 | 0.0007±0.0001     | 0.068±0.006       |
| 0.081     | 0.25±0.03 | 0.0007±0.0003     | 0.069±0.013       |
| 0.095     | 0.31±0.03 | 0.0013±0.0006     | 0.095±0.012       |
| 0.109     | 0.28±0.04 | 0.0032±0.0007     | 0.135±0.030       |
| 0.122     | 0.37±0.05 | 0.0015±0.0001     | 0.131±0.028       |

Table S 5 Fit Parameters of the intermediate scattering function of the microemulsion inside the hydrophobic CPG50-CH<sub>3</sub>

| $q$ (1/Å) | $A$       | $\Gamma_c$ (1/ns) | $\Gamma_z$ (1/ns) |
|-----------|-----------|-------------------|-------------------|
| 0.032     | 0.06±0.01 | 0.0006±0.0001     | 0.128±0.023       |
| 0.041     | 0.10±0.01 | 0.0006±0.0001     | 0.056±0.008       |
| 0.050     | 0.13±0.02 | 0.0007±0.0001     | 0.051±0.008       |
| 0.060     | 0.16±0.02 | 0.0009±0.0001     | 0.066±0.007       |
| 0.071     | 0.19±0.01 | 0.0012±0.0001     | 0.095±0.010       |
| 0.081     | 0.26±0.02 | 0.0012±0.0002     | 0.080±0.009       |
| 0.095     | 0.29±0.02 | 0.0028±0.0005     | 0.154±0.019       |
| 0.109     | 0.37±0.03 | 0.0029±0.0006     | 0.142±0.018       |
| 0.122     | 0.44±0.03 | 0.0038±0.0008     | 0.168±0.019       |

Table S 6 Fit Parameters of the intermediate scattering function of the microemulsion inside the hydrophilic CPG100-OH

| $q$ (1/Å) | $A$       | $\Gamma_c$ (1/ns) | $\Gamma_z$ (1/ns) |
|-----------|-----------|-------------------|-------------------|
| 0.032     | 0.12±0.02 | 0.0004±0.0001     | 0.024±0.003       |
| 0.041     | 0.15±0.02 | 0.0005±0.0001     | 0.031±0.004       |
| 0.050     | 0.20±0.03 | 0.0006±0.0002     | 0.032±0.006       |
| 0.060     | 0.21±0.02 | 0.0014±0.0002     | 0.076±0.011       |
| 0.071     | 0.28±0.02 | 0.0015±0.0002     | 0.079±0.008       |
| 0.081     | 0.39±0.03 | 0.0010±0.0004     | 0.063±0.007       |
| 0.095     | 0.30±0.03 | 0.0051±0.0007     | 0.183±0.025       |
| 0.109     | 0.42±0.04 | 0.0031±0.0011     | 0.149±0.021       |
| 0.122     | 0.48±0.05 | 0.0024±0.0014     | 0.149±0.022       |

Table S 7 Fit Parameters of the intermediate scattering function of the microemulsion inside the hydrophobic CPG100-CH<sub>3</sub>

| $q$ (1/Å) | $A$       | $\Gamma_c$ (1/ns) | $\Gamma_z$ (1/ns) |
|-----------|-----------|-------------------|-------------------|
| 0.032     | 0.09±0.01 | 0.0009±0.0001     | 0.055±0.010       |
| 0.041     | 0.15±0.02 | 0.0010±0.0001     | 0.040±0.005       |
| 0.050     | 0.20±0.02 | 0.0011±0.00001    | 0.046±0.006       |
| 0.060     | 0.22±0.02 | 0.0018±0.0002     | 0.071±0.008       |
| 0.071     | 0.30±0.02 | 0.0017±0.0002     | 0.072±0.007       |
| 0.081     | 0.33±0.02 | 0.0023±0.0003     | 0.092±0.009       |
| 0.095     | 0.40±0.02 | 0.0041±0.0006     | 0.136±0.011       |
| 0.109     | 0.44±0.03 | 0.0059±0.0007     | 0.178±0.018       |
| 0.122     | 0.56±0.03 | 0.0055±0.0011     | 0.152±0.014       |

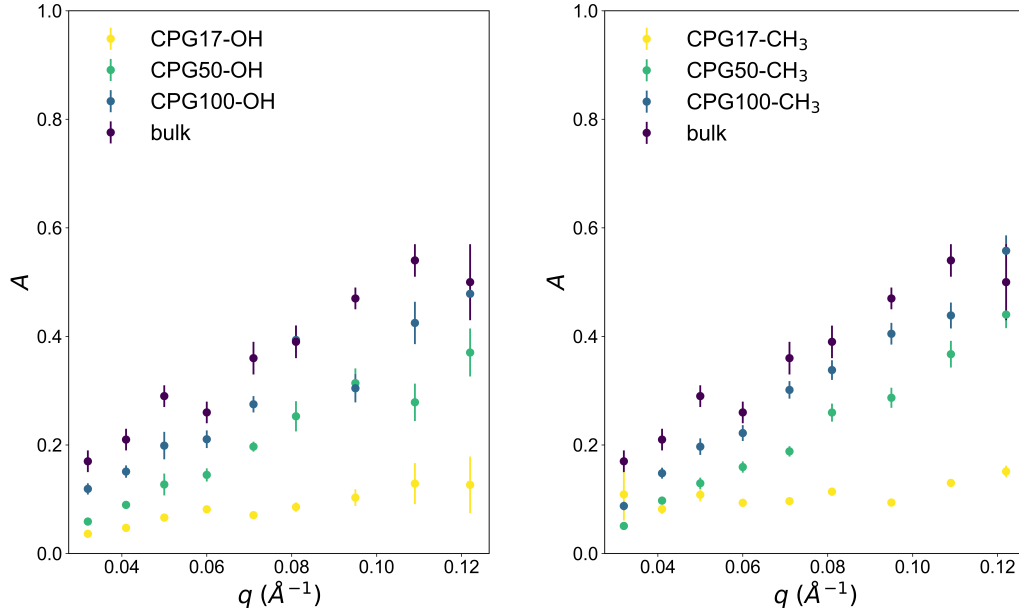

Fig. S 7 Amplitudes  $A(q)$  of the Zilman-Granek contribution to the fitting model given in Eq. 7 in the main paper. For CPG17 the relaxation rate of the concentration fluctuations was fixed in Eq. 7 at  $\Gamma_c = 0$ . The plot on the left side shows  $A(q)$  for the hydrophilic pore surfaces and the right side plot shows  $A(q)$  for the hydrophobized pore surfaces.

Table S 8 Fit Parameters of the intermediate scattering function of the microemulsion inside the hydrophilic CPG17-OH, using Eq.7 neglecting the contributions of the concentration fluctuations ( $\Gamma_c = 0$ )

| $q$ (1/Å) | $A$       | $\Gamma_z$ (1/ns) |
|-----------|-----------|-------------------|
| 0.032     | 0.04±0.01 | 0.074±0.027       |
| 0.041     | 0.05±0.01 | 0.048±0.019       |
| 0.050     | 0.07±0.01 | 0.036±0.009       |
| 0.060     | 0.08±0.01 | 0.028±0.005       |
| 0.071     | 0.07±0.01 | 0.053±0.010       |
| 0.081     | 0.09±0.01 | 0.053±0.019       |
| 0.095     | 0.10±0.02 | 0.040±0.014       |
| 0.109     | 0.13±0.04 | 0.031±0.018       |
| 0.122     | 0.13±0.05 | 0.044±0.040       |

Table S 9 Fit Parameters of the intermediate scattering function of the microemulsion inside the hydrophobic CPG17-CH<sub>3</sub>, using Eq.7 neglecting the contributions of the concentration fluctuations ( $\Gamma_c = 0$ )

| $q$ (1/Å) | $A$       | $\Gamma_z$ (1/ns) |
|-----------|-----------|-------------------|
| 0.032     | 0.20±0.05 | 0.005±0.003       |
| 0.041     | 0.08±0.01 | 0.016±0.004       |
| 0.050     | 0.11±0.02 | 0.017±0.005       |
| 0.060     | 0.09±0.01 | 0.040±0.006       |
| 0.071     | 0.10±0.02 | 0.040±0.005       |
| 0.081     | 0.11±0.01 | 0.047±0.011       |
| 0.095     | 0.09±0.01 | 0.091±0.020       |
| 0.109     | 0.13±0.01 | 0.092±0.014       |
| 0.122     | 0.15±0.02 | 0.079±0.019       |
